# Supplementary material
Source: PubMed Central journal article supplement (PMC2579342)
Supplement: 0809427105_0809427105SI.pdf [file 0809427105_0809427105SI.pdf]

# Supporting Information

Chen *et al.* 10.1073/pnas.0809427105

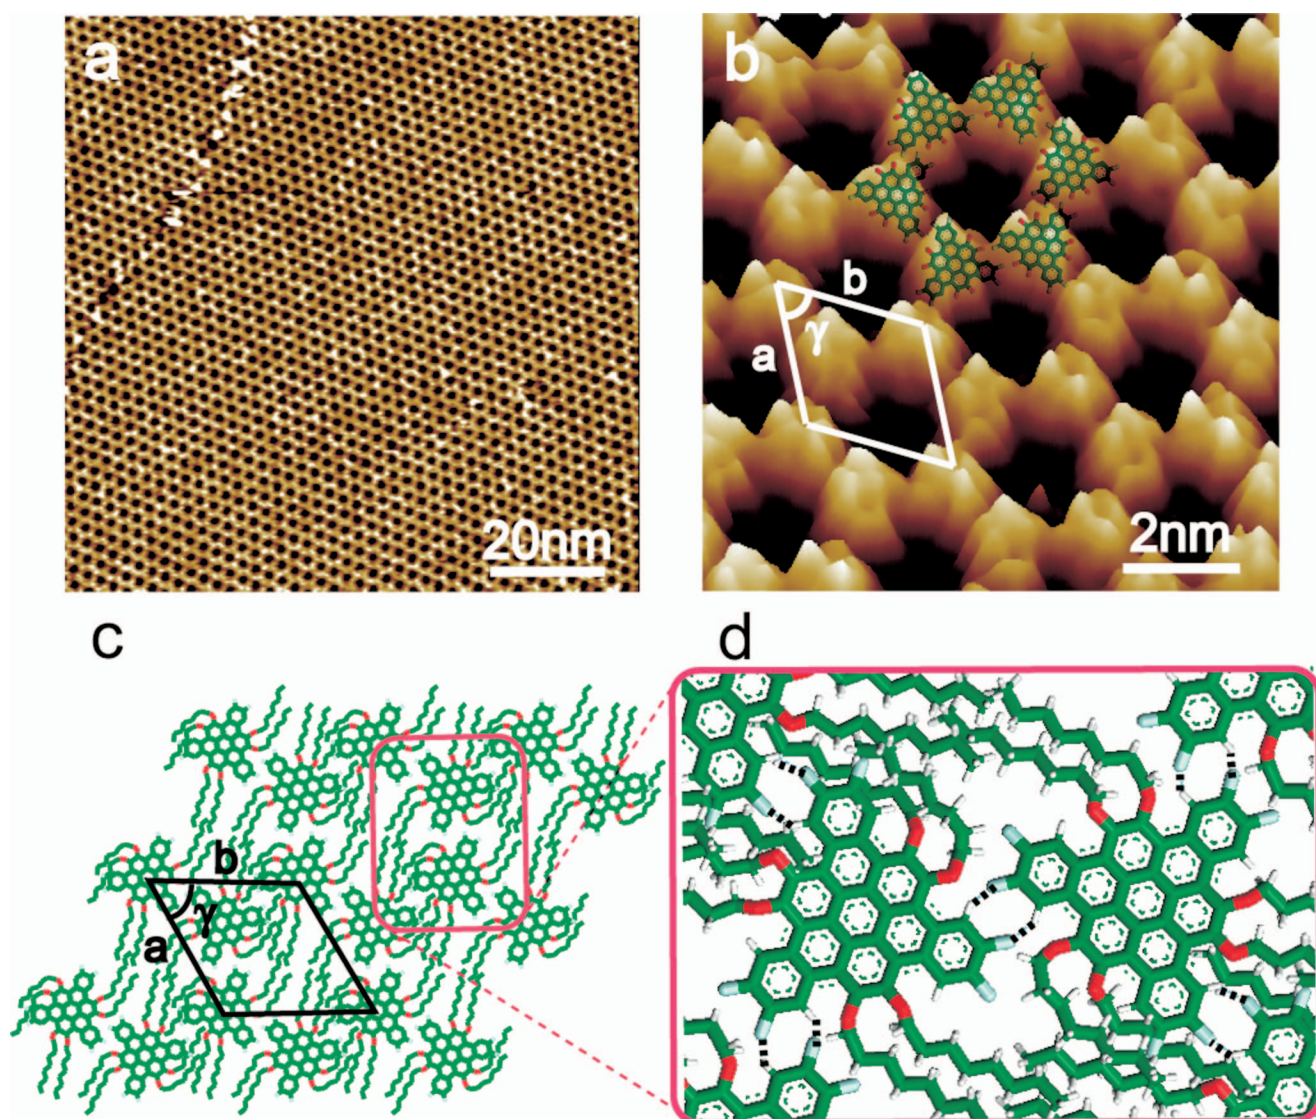

Fig. S1. Self-assembly of FTBC-C8 on HOPG. (a) Large-scale STM image.  $V_{\text{bias}} = -1.32$  V;  $I_t = 120$  pA. (b) High-resolution STM image.  $V_{\text{bias}} = -1.53$  V;  $I_t = 529$  pA. (c) Proposed structural model for the ordered adlayer. (d) Possible hydrogen bonds between the molecules indicated by black dashed lines.
